# Supplementary material for: Plasmin releases the anti-tumor peptide from the NC1 domain of collagen XIX
Source: PubMed Central journal article supplement (PMC4414144; doi:10.18632/oncotarget.2849), 2015-01-21
Supplement: oncotarget-06-3656-s001.pdf [file oncotarget-06-3656-s001.pdf]

## SUPPLEMENTARY FIGURE AND TABLES

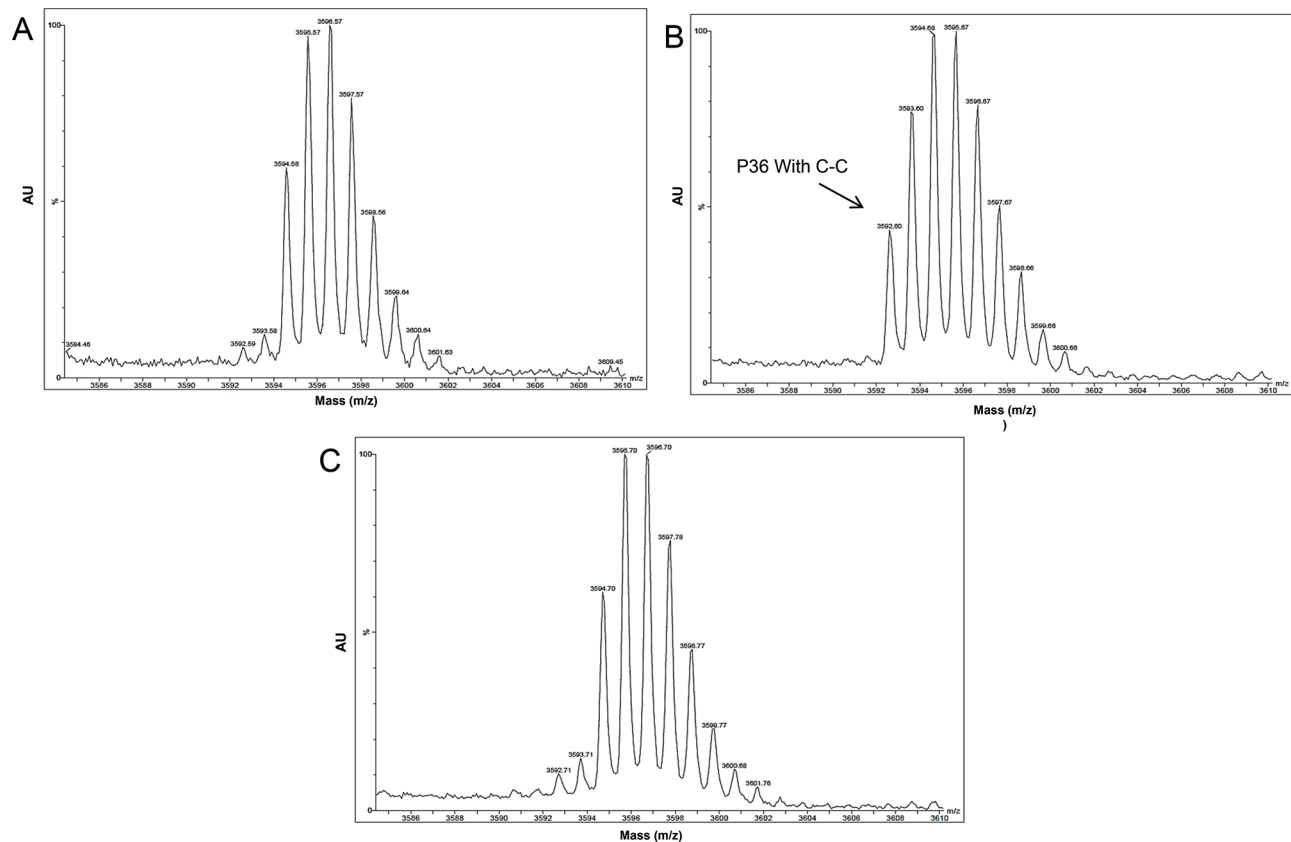

**Supplementary Figure S1: NC1(XIX) domain of collagen XIX makes disulfide bond in solution. (A)** MALDI-ToF MS analysis showing that P36 peptide in solution at T0 presented no disulfide bond. **(B)** MALDI-ToF MS analysis at 1 h demonstrating that the P36 peptide of collagen XIX made a disulfide bond in its NC1(XIX) domain over the time. **(C)** MALDI-ToF MS analysis showing that in the presence of dithiothreitol (DTT), the disulfide bond disappeared

**Supplementary Table S1:  $\beta$ -turn analysis of the trajectories**

| Peptides                    | Starting structure          | Sequence of type I turn above threshold        |
|-----------------------------|-----------------------------|------------------------------------------------|
| P19                         | <b>Elongated</b>            | SHAH ; HAHQ ; QRTG                             |
|                             | <b>Itasser prediction</b>   | NPED ; LYPV ; VSHA ; QRTG                      |
|                             | <b>Pepfold prediction</b>   | NPED ; PVSH ; VSHA ; AHQR ; RTGG               |
| F4 without disulfide bridge | <b>Elongated</b>            | SHAH                                           |
|                             | <b>Itasser prediction</b>   | NPED ; VSHA ; SHAH ; HAHQ                      |
|                             | <b>Pepfold prediction</b>   | NPED ; SHAH                                    |
| F4 with disulfide bridge    | <b>From Elongated start</b> | NPED ; PEDC                                    |
|                             | <b>Pepfold prediction</b>   | NPED ; DCLY ; PVSH ; VSHA ; SHAH ; HAHQ ; AHQR |

**Supplementary Table S2: Sequences of the peptides used in the study**

| Names                | Peptide sequences                                                             | Substitutions             |
|----------------------|-------------------------------------------------------------------------------|---------------------------|
| P19                  | <sup>1124</sup> NPEDCLYPVSHAHQRTGGN <sup>1142</sup>                           |                           |
| P36                  | <sup>1107</sup> SPGAPGPQPPGPSGRNPEDCLYPVSHAHQRTGGN <sup>1142</sup>            |                           |
| P36G <sup>1122</sup> | <sup>1107</sup> SPGAPGPQPPGPS <u>G</u> CNPEDCLYPVSHAHQRTGGN <sup>1142</sup>   | Arg <sup>1122</sup> → Gly |
| P36W <sup>1121</sup> | <sup>1107</sup> SPGAPGPQPPGPS <u>W</u> RNPEDCLYPVSHAHQRTGGN <sup>1142</sup>   | Gly <sup>1121</sup> → Trp |
| P36W <sup>1120</sup> | <sup>1107</sup> SPGAPGPQPPGPS <u>W</u> GRCNPEDCLYPVSHAHQRTGGN <sup>1142</sup> | Ser <sup>1120</sup> → Trp |
| P36W <sup>1123</sup> | <sup>1107</sup> SPGAPGPQPPGPSR <u>W</u> NPEDCLYPVSHAHQRTGGN <sup>1142</sup>   | Cys <sup>1123</sup> → Trp |
| P36W <sup>1124</sup> | <sup>1107</sup> SPGAPGPQPPGPSR <u>W</u> PEDCLYPVSHAHQRTGGN <sup>1142</sup>    | Asp <sup>1124</sup> → Trp |
